# Supplementary material for: Antibiotherapy in Children with Cystic Fibrosis—An Extensive Review
Source: MDPI journal article supplement (doi:10.3390/children9081258), 2022-08-20
Supplement: s1 [file s1]

Table S1. Characteristics of the articles included in the study

| No. | Title                                                                                                                                                                                            | Authors                    | City and Country     | Year of Publication | Type             | No. of Cases | Observation |
|-----|--------------------------------------------------------------------------------------------------------------------------------------------------------------------------------------------------|----------------------------|----------------------|---------------------|------------------|--------------|-------------|
| 1   | Genomic Diversity and Antimicrobial Resistance of <i>Haemophilus</i> Colonizing the Airways of Young Children with Cystic Fibrosis                                                               | Watts S.C <i>et al.</i>    | Melbourne, Australia | 2021                | Original article | 147          |             |
| 2   | Clinical Pharmacokinetic and Pharmacodynamic Considerations in the Drug Treatment of Non-Tuberculous Mycobacteria in Cystic Fibrosis                                                             | Andrew Burke <i>et al.</i> | Brisbane, Australia  | 2021                | Review article   | -            |             |
| 3   | Factors influencing the acquisition and eradication of early <i>Pseudomonas aeruginosa</i> infection in cystic fibrosis.                                                                         | Jackson L. <i>et al.</i>   | Toronto, Canada      | 2021                | Review article   | -            |             |
| 4   | The clinical and microbiological utility of inhaled aztreonam lysine for the treatment of acute pulmonary exacerbations of cystic fibrosis: An open-label randomised crossover study (AZTEC-CF). | Frost F. <i>et al.</i>     | Liverpool, UK        | 2021                | Original article | 12           |             |
| 5   | Antimicrobial activity of ceftazidime/avibactam, ceftolozane/ tazobactam and comparator agents against <i>Pseudomonas</i>                                                                        | Sader <i>et al.</i>        | USA                  | 2021                | Original article |              |             |

|    |                                                                                                                                                                                                      |                          |                  |      |                  |    |
|----|------------------------------------------------------------------------------------------------------------------------------------------------------------------------------------------------------|--------------------------|------------------|------|------------------|----|
|    | aeruginosa from cystic fibrosis patients                                                                                                                                                             |                          |                  |      |                  |    |
| 6. | Optimization of Aztreonam in Combination With Ceftazidime/Avibactam in a Cystic Fibrosis Patient With Chronic Stenotrophomonas maltophilia Pneumonia Using Therapeutic Drug Monitoring: A Case Study | Cowart <i>et al.</i>     |                  | 2021 | Case report      | 1  |
| 7  | Ceftazidime-avibactam for the treatment of multidrug resistant Burkholderia cepacia complex in a pediatric cystic fibrosis patient                                                                   | Nguyen <i>et al.</i>     |                  | 2020 | Case report      | 1  |
| 8  | Antibiotic treatment for nontuberculous mycobacteria lung infection in people with cystic fibrosis.                                                                                                  | Waters V. <i>et al.</i>  | Toronto, Canada  | 2020 | Review article   | -  |
| 9  | Investigation of Stenotrophomonas maltophilia epidemiology in a French cystic fibrosis center.                                                                                                       | Capaldo C. <i>et al.</i> | Brest, France    | 2020 | Original article | 90 |
| 10 | Phase I, Dose-Escalating Study of the Safety and Pharmacokinetics of Inhaled Dry-Powder Vancomycin (AeroVanc) in Volunteers and Patients with Cystic Fibrosis: a New Approach to Therapy for         | Waterer G. <i>et al.</i> | Perth, Australia | 2020 | Clinical Trial   | 29 |

|    |                                                                                                                        |                           |                                                  |      |                  |     |                               |
|----|------------------------------------------------------------------------------------------------------------------------|---------------------------|--------------------------------------------------|------|------------------|-----|-------------------------------|
|    | Methicillin-Resistant<br>Staphylococcus aureus.                                                                        |                           |                                                  |      |                  |     |                               |
| 11 | Antimicrobial Treatment of Staphylococcus aureus in Patients With Cystic Fibrosis                                      | Esposito S. <i>et al.</i> | Perugia, Italy                                   | 2019 | Review article   |     |                               |
| 12 | Methicillin-resistant Staphylococcus aureus eradication in cystic fibrosis patients: A randomized multicenter study.   | Dolce D. <i>et al.</i>    | Florence, Rome, Milan, Messina and Naples, Italy | 2019 | Original article | 61  |                               |
| 13 | Eradication of persistent methicillin-resistant Staphylococcus aureus infection in cystic fibrosis                     | Dezube R. <i>et al.</i>   | Baltimore, United States                         | 2019 | Clinical Trial   | 29  |                               |
| 14 | Interventions for the eradication of methicillin-resistant Staphylococcus aureus (MRSA) in people with cystic fibrosis | Lo DKH <i>et al.</i>      | Leicester, UK                                    | 2018 | Review article   | 106 | Searched two clinical trials. |
| 15 | Stenotrophomonas maltophilia: A marker of lung disease severity.                                                       | Berdah L. <i>et al.</i>   | Paris, France                                    | 2018 | Original article | 23  |                               |
| 16 | Biology and management of methicillin resistant Staphylococcus aureus in cystic fibrosis.                              | Akil N. <i>et al.</i>     | Chapel Hill, North Carolina                      | 2018 | Review article   |     |                               |
| 17 | Antibiotic strategies for eradicating Pseudomonas aeruginosa in people with cystic fibrosis.                           | Langton H. <i>et al.</i>  | Bristol, UK                                      | 2017 | Review article   |     |                               |
| 18 | Pharmacokinetic-Pharmacodynamic Target Attainment                                                                      | Bensman <i>et al.</i>     | USA                                              | 2017 | Original article | 12  |                               |

|    |                                                                                                                                                                                      |                            |                             |      |                  |    |
|----|--------------------------------------------------------------------------------------------------------------------------------------------------------------------------------------|----------------------------|-----------------------------|------|------------------|----|
|    | Analyses To Determine Optimal Dosing of Ceftazidime-Avibactam for the Treatment of Acute Pulmonary Exacerbations in Patients with Cystic Fibrosis                                    |                            |                             |      |                  |    |
| 19 | Burkholderia cenocepacia infections in cystic fibrosis patients: Drug resistance and therapeutic approaches.                                                                         | Scoffone V.C <i>et al.</i> | Pavia, Italy                | 2017 | Review article   |    |
| 20 | Evolution of <i>Stenotrophomonas maltophilia</i> in cystic fibrosis lung over chronic infection: A genomic and phenotypic population study                                           | Esposito A, <i>et al.</i>  | Italy                       | 2017 | Original article | 10 |
| 21 | Outcomes associated with antibiotic regimens for treatment of <i>Mycobacterium abscessus</i> in cystic fibrosis patients.                                                            | DaCosta A, <i>et al.</i>   | Chapel Hill, North Carolina | 2017 | Original article | 37 |
| 22 | US Cystic Fibrosis Foundation and European Cystic Fibrosis Society consensus recommendations for the management of non-tuberculous mycobacteria in individuals with cystic fibrosis. | Floto A, <i>et al.</i>     |                             | 2016 | Review article   |    |
| 23 | Antibiotic treatment for <i>Stenotrophomonas</i>                                                                                                                                     | Amin R,Waters V.           | Toronto, Canada.            | 2016 | Review article   |    |

|    |                                                                                                                                                    |                                |               |      |                  |     |
|----|----------------------------------------------------------------------------------------------------------------------------------------------------|--------------------------------|---------------|------|------------------|-----|
|    | maltophilia in people with cystic fibrosis.                                                                                                        |                                |               |      |                  |     |
| 24 | Continuous alternating inhaled antibiotics for chronic pseudomonal infection in cystic fibrosis.                                                   | Patrick A. Flume <i>et al.</i> |               | 2016 | Original article | 90  |
| 25 | Risk factors for lung function decline in a large cohort of young cystic fibrosis patients.                                                        | Cogen J, <i>et al.</i>         | United States | 2015 | Original article | 946 |
| 26 | Inhaled therapy in cystic fibrosis: agents, devices and regimens.                                                                                  | Penny Agent, Helen Parrott     | London, UK    | 2015 | Review article   | -   |
| 27 | Infection prevention and control guideline for cystic fibrosis: 2013 update.                                                                       | Saiman L, <i>et al.</i>        |               | 2014 | Guideline        |     |
| 28 | Antibiotic management of lung infections in cystic fibrosis. II. Nontuberculous mycobacteria, anaerobic bacteria, and fungi.                       | Chmiel JF, <i>et al.</i>       |               | 2014 | Review           |     |
| 29 | European Cystic Fibrosis Society Standards of Care: Best Practice guidelines.                                                                      | Smyth AR, <i>et al.</i>        |               | 2014 | Review           |     |
| 30 | Cystic fibrosis foundation pulmonary guideline pharmacologic approaches to prevention and Eradication of Initial Pseudomonas aeruginosa Infection. | Mogayzel PJ, <i>et al.</i>     |               | 2014 | Review           |     |
| 31 | Antibiotic management of lung infections in cystic fibrosis. I. The                                                                                | Chmiel JF, <i>et al.</i>       |               | 2014 | Review           |     |

|    |                                                                                                                                                                       |                           |                     |      |                  |     |
|----|-----------------------------------------------------------------------------------------------------------------------------------------------------------------------|---------------------------|---------------------|------|------------------|-----|
|    | microbiome, methicillin-resistant <i>Staphylococcus aureus</i> , gram-negative bacteria, and multiple infections.                                                     |                           |                     |      |                  |     |
| 32 | Treatment of lung infection in patients with cystic fibrosis: Current and future strategies.                                                                          | Döring G, <i>et al.</i>   |                     | 2012 | Review           |     |
| 33 | Phenotypes selected during chronic lung infection in cystic fibrosis patients: implications for the treatment of <i>Pseudomonas aeruginosa</i> biofilm infections.    | Ciofu O, <i>et al.</i>    | Copenhagen, Denmark | 2012 | Original article |     |
| 34 | Incidence and risk factors for pulmonary exacerbation treatment failures in patients with cystic fibrosis chronically infected with <i>Pseudomonas aeruginosa</i> .   | Parkins MD, <i>et al.</i> | Northern Ireland    | 2012 | Original article | 101 |
| 35 | <i>Haemophilus influenzae</i> Forms Biofilms on Airway Epithelia.                                                                                                     | Starner TD, <i>et al.</i> | Iowa                | 2012 | Original article | 10  |
| 36 | <i>Haemophilus influenzae</i> in children with cystic fibrosis: Antimicrobial susceptibility, molecular epidemiology, distribution of adhesins and biofilm formation. | Cardines R, <i>et al.</i> | Rome, Italy         | 2012 | Original article | 300 |
| 37 | Therapeutic approaches to chronic cystic fibrosis respiratory infections                                                                                              | Ballmann M, <i>et al.</i> |                     | 2011 | Review           |     |

|    |                                                                                                                                                                                                   |                             |                           |      |                  |     |
|----|---------------------------------------------------------------------------------------------------------------------------------------------------------------------------------------------------|-----------------------------|---------------------------|------|------------------|-----|
|    | with available, emerging aerosolized antibiotics.                                                                                                                                                 |                             |                           |      |                  |     |
| 38 | Review: Staphylococcus aureus and MRSA in cystic fibrosis.                                                                                                                                        | Goss CH, <i>et al.</i>      | Seattle WA, United States | 2011 | Review           |     |
| 39 | Clinical practice guidelines by the Infectious Diseases Society of America for the treatment of methicillin-resistant Staphylococcus aureus infections in adults and children: executive summary. | Liu C, <i>et al.</i>        |                           | 2011 | Review           |     |
| 40 | Linezolid vs Glycopeptide Antibiotics for the Treatment of Suspected Methicillin-Resistant Staphylococcus aureus Nosocomial Pneumonia: A Meta-analysis of Randomized Controlled Trials.           | Walkey AJ, <i>et al.</i>    |                           | 2011 | Meta-analysis    |     |
| 41 | Stenotrophomonas maltophilia in cystic fibrosis: Serologic response and effect on lung disease.                                                                                                   | Waters V, <i>et al.</i>     | Toronto, Ontario, Canada  | 2011 | Original article | 692 |
| 42 | Pseudomonas aeruginosa biofilms in cystic fibrosis.                                                                                                                                               | Høiby N, <i>et al.</i>      | Copenhagen, Denmark       | 2010 | Review article   |     |
| 43 | An 18-month study of the safety and efficacy of repeated courses of inhaled aztreonam lysine in cystic fibrosis.                                                                                  | Oermann C.M., <i>et al.</i> |                           | 2010 | Original article | 274 |
| 44 | Effect of azithromycin on pulmonary function                                                                                                                                                      | Saiman L, <i>et al.</i>     | New York, United States   | 2010 | Original article | 260 |

|    |                                                                                                                                                     |                                      |                          |        |                  |      |
|----|-----------------------------------------------------------------------------------------------------------------------------------------------------|--------------------------------------|--------------------------|--------|------------------|------|
|    | in patients with cystic fibrosis uninfected with <i>Pseudomonas aeruginosa</i> : a randomized controlled trial.                                     |                                      |                          |        |                  |      |
| 45 | Burkholderia cenocepacia in cystic fibrosis: Epidemiology and molecular mechanisms of virulence.                                                    | Drevinek P., <i>et al.</i>           | Prague, Czech Republic.  | 2010   | Review article   |      |
| 46 | Challenging and emerging pathogens in cystic fibrosis.                                                                                              | De Vrankrijker A.M.M., <i>et al.</i> | Utrecht, The Netherlands | 2010   | Review article   |      |
| 47 | Nontuberculous Mycobacteria-associated Lung Disease in Hospitalized Persons, United States, 1998–2005.                                              | Billinger M.E., <i>et al.</i>        | United States            | 2009   | Review article   |      |
| 48 | Cystic fibrosis pulmonary guidelines: treatment of pulmonary exacerbations.                                                                         | Flume P.A., <i>et al.</i>            | United States            | 2009   | Review article   |      |
| 49 | Early Anti-Pseudomonal Acquisition in Young Patients with Cystic Fibrosis: Rationale and Design of the EPIC Clinical Trial and Observational Study. | Treggiari M.M., <i>et al.</i>        | Seattle, United States   | , 2009 | Clinical Trial   | 1787 |
| 50 | Impact of <i>Pseudomonas</i> and <i>Staphylococcus</i> Infection on Inflammation and Clinical Status in Young Children with Cystic Fibrosis.        | Sagel S.D., <i>et al.</i>            | Colorado, United States. | 2009   | Original article | 111  |
| 51 | Therapeutic options for <i>Burkholderia cepacia</i>                                                                                                 | Avgeri S.G., <i>et al.</i>           | Athens, Greece.          | 2009   | Review article   |      |



|    |                                                                                                                                                                                         |                                    |                                    |      |                  |        |
|----|-----------------------------------------------------------------------------------------------------------------------------------------------------------------------------------------|------------------------------------|------------------------------------|------|------------------|--------|
|    | infections beyond co-trimoxazole: a systematic review of the clinical evidence.                                                                                                         |                                    |                                    |      |                  |        |
| 52 | Persistent methicillin-resistant <i>Staphylococcus aureus</i> and rate of FEV1 decline in cystic fibrosis.                                                                              | Dasenbrook E.C., <i>et al.</i>     | Baltimore, Maryland, United States | 2008 | Original article | 17.357 |
| 53 | <i>Achromobacter xylosoxidans</i> in cystic fibrosis: Prevalence and clinical relevance.                                                                                                | De Baets F., <i>et al.</i>         | Ghent, Belgium                     | 2007 | Original article | 140    |
| 54 | The multifarious, multireplicon <i>Burkholderia cepacia</i> complex.                                                                                                                    | Mahenthiralingam E., <i>et al.</i> | Cardiff, UK                        | 2005 | Review article   |        |
| 55 | Eradication of early <i>Pseudomonas aeruginosa</i> infection.                                                                                                                           | Højby N., <i>et al.</i>            | Copenhagen, Denmark                | 2005 | Review article   |        |
| 56 | Combination antibiotic susceptibility testing to treat exacerbations of cystic fibrosis associated with multiresistant bacteria: a randomised, double-blind, controlled clinical trial. | Aaron S.D., <i>et al.</i>          | Ottawa, Canada                     | 2005 | Original article | 251    |
| 57 | Multiresistant pulmonary infection in cystic fibrosis—prevention is better than cure.                                                                                                   | Smyth A.                           | Nottingham, UK                     | 2005 | Review article   |        |
| 58 | Early intervention and prevention of lung disease in cystic fibrosis: a European consensus.                                                                                             | Döring G., <i>et al.</i>           |                                    | 2004 | Review article   |        |
| 59 | Infection Control Recommendations for Patients With Cystic Fibrosis: Microbiology,                                                                                                      | Saiman L., <i>et al.</i>           | United States                      | 2003 | Review article   |        |

|    |                                                                                                                                                                        |                             |                            |      |                  |     |
|----|------------------------------------------------------------------------------------------------------------------------------------------------------------------------|-----------------------------|----------------------------|------|------------------|-----|
|    | Important Pathogens, and Infection Control Practices to Prevent Patient-to-Patient Transmission.                                                                       |                             |                            |      |                  |     |
| 60 | Evaluation of a new definition for chronic <i>Pseudomonas aeruginosa</i> infection in cystic fibrosis patients.                                                        | Lee T.W.R., <i>et al.</i>   | Leeds, UK                  | 2003 | Original article | 232 |
| 61 | Significant microbiological effect of inhaled tobramycin in young children with cystic fibrosis.                                                                       | Gibson R.L., <i>et al.</i>  | United States              | 2003 | Original article | 98  |
| 62 | Susceptibility Testing of <i>Pseudomonas aeruginosa</i> Isolates and Clinical Response to Parenteral Antibiotic Administration Lack of Association in Cystic Fibrosis. | Smith A.L., <i>et al.</i>   | Seattle, United States     | 2003 | Original article | 520 |
| 63 | Nontuberculous mycobacteria. I: multicenter prevalence study in cystic fibrosis.                                                                                       | Olivier K.N., <i>et al.</i> | Chapel Hill, United States | 2003 | Original article | 986 |
| 64 | Epidemiology of <i>Burkholderia cepacia</i> Complex in Patients with Cystic Fibrosis, Canada.                                                                          | Speert D.P., <i>et al.</i>  | Canada                     | 2002 | Original article | 459 |
| 65 | Antibiotic prophylaxis in infants and young children with cystic fibrosis: A randomized controlled trial.                                                              | Stutman H.R., <i>et al.</i> | California, United States  | 2002 | Original article | 119 |
| 66 | Understanding bacterial biofilms in patients with cystic fibrosis: current                                                                                             | Høiby N.                    | Copenhagen, Denmark        | 2002 | Review article   |     |

and innovative approaches to potential therapies.

|    |                                                                                                                                                                      |                               |                           |      |                  |     |
|----|----------------------------------------------------------------------------------------------------------------------------------------------------------------------|-------------------------------|---------------------------|------|------------------|-----|
| 67 | Identification and antimicrobial susceptibility of <i>Alcaligenes xylosoxidans</i> isolated from patients with cystic fibrosis.                                      | Saiman L., <i>et al.</i>      | New York, United States   | 2001 | Original article | 78  |
| 68 | Serum and lower respiratory tract drug concentrations after tobramycin inhalation in young children with cystic fibrosis.                                            | Rosenfeld M., <i>et al.</i>   | Washington, United States | 2001 | Original article | 25  |
| 69 | Effect of continuous antistaphylococcal therapy on the rate of <i>P. aeruginosa</i> acquisition in patients with cystic fibrosis.                                    | Ratjen F., <i>et al.</i>      | Germany                   | 2001 | Original article | 639 |
| 70 | Antibiotic therapy against <i>Pseudomonas aeruginosa</i> in cystic fibrosis: a European consensus.                                                                   | Döring G., <i>et al.</i>      |                           | 2000 | Review           |     |
| 71 | Changing Epidemiology of <i>Pseudomonas aeruginosa</i> Infection in Danish Cystic Fibrosis Patients (1974-1995).                                                     | Frederiksen B., <i>et al.</i> | Copenhagen, Denmark.      | 1999 | Original article | 256 |
| 72 | Antibiotic susceptibility of multiply resistant <i>Pseudomonas aeruginosa</i> isolated from patients with cystic fibrosis, including candidates for transplantation. | Saiman L., <i>et al.</i>      | New York, United States   | 1996 | Original article | 172 |

|    |                                                                                               |                            |                     |      |                     |     |
|----|-----------------------------------------------------------------------------------------------|----------------------------|---------------------|------|---------------------|-----|
| 73 | Risk factors for<br>Pseudomonas<br>aeruginosa colonization<br>in cystic fibrosis<br>patients. | Kerem E., <i>et al.</i>    | Toronto,<br>Canada. | 1990 | Original<br>article | 502 |
| 74 | Haemophilus infection<br>in cystic fibrosis.                                                  | Rayner R.J., <i>et al.</i> | Nottingham,<br>Uk   | 1990 | Original<br>article | 27  |
